# Supplementary material
Source: publisher site journal article supplement (https://www.dovepress.com/get_supplementary_file.php?f=245915.docx)
Supplement: Supplementary file 1 [file get_supplementary_file.php]

| **Supplementary Table 1** iSCRIPT reverse transcription reaction mixture. | | |
| --- | --- | --- |
| Components | Volume per reaction,μL | |
| iSCRIPT reverse transcription supermix | 4 | Mastermix |
| Nuclease free water | 11 |
| RNA template | 5 | |
| Total volume | 20 | |

| **Supplementary Table 2** C1000 Touch Thermal Cycler reverse transcription protocol. | |
| --- | --- |
| 1. Priming | 5 minutes at 25°C |
| 2. Reverse transcription | 20 minutes at 46°C |
| 3. RT inactivation | 1 minute at 95°C |

| **Supplementary Table 3** Genes of interest for qPCR and the identification of the primers. All primers were purchased from Bio-Rad. | | |
| --- | --- | --- |
| Gene | Aliases | Bio-Rad Assay ID |
| Alpha Smooth Muscle Actin | *ACTA2* | qHsaCIP0028813 |
| Collagen Type III Alpha 1 Chain | *COL3A1* | qHsaCEP0052821 |
| Connective Tissue Growth Factor | *CTGF* | qHsaCEP0024255 |
| Vascular Endothelial Growth Factor A | *VEGFA* | qHsaCEP0050718 |
| Gremlin 1, DAN Family BMP Antagonist | *GREM1* | qHSaCEP0053682 |
| Cellular Communication Network Factor 3 | *CCN3* | qHsaCEP0049751 |
| Integrin Subunit Beta 5 | *ITGβ-5* | *q*HsaCIP0027804 |
| Ribosomal Protein S18 | *RPS18* | *q*HsaCEP0040177 |
| Glyceraldehyde 3-Phosphate Dehydrogenase | *GAPDH* | *q*HsaCEP0041396 |
| Collagen Type I Alpha 2 | *COL1A2* | qHsaCEP0024891 |

| **Supplementary Table 4** SsoAdvanced supermix qPCR reaction protocol. | | |
| --- | --- | --- |
| Component | Volume per 20 μl reaction | Final concentration |
| SsoAdvanced universal probes supermix (2x) | 10 μl | 1x |
| Forward and reverse primers | Variable | 250–900 nM each |
| Fluorogenic probe | Variable | 150–250 nM each |
| Template  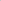 | Variable | cDNA: 100 ng–100 fg  Genomic DNA: 500 ng–5 pg |
| Nuclease-free H2O | Variable | *—* |
| *Total reaction mix volume* | *20* μ*l* | *—* |

| **Supplementary Table 5** CFX96 qPCR reaction protocol. | | | | | |
| --- | --- | --- | --- | --- | --- |
| Real-Time PCR System | 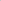 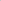 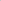 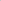  Setting/ Scan Mode | Polymerase Activation and DNA Denaturation | 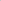  Amplification | | |
|  | 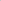 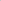  Denaturation at 95°C | Annealing/ Extension + Plate Read at 60°C | 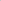  Cycles |
| Bio-Rad® CFX96 TouchTM | All channels | 30 sec at 95°C for cDNA | 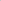 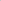5–15 sec  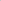 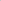 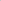 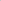 | 10–30 sec | 35–40  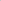 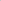 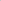 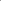 |
